# Supplementary material for: Chemical Profiles, In Vitro Antioxidant and Antifungal Activity of Four Different Lavandula angustifolia L. EOs
Source: MDPI journal article supplement (doi:10.3390/molecules28010392), 2023-01-02
Supplement: s1 [file s1]

## Supplementary Materials

### Chemical Profiles, In Vitro Antioxidant and Antifungal Activity of Four Different *Lavandula angustifolia* L. EOs

Claudio Caprari, Francesca Fantasma, Pamela Monaco, Fabio Divino, Maria Iorizzi, Giancarlo Ranalli, Fausto Fasano and Gabriella Saviano \*

Department of Bioscience and Territory, University of Molise, C.da Fonte Lappone snc, 86090 Pesche, Italy

\* Correspondence: saviano@unimol.it; Tel.: +39-0874404117

**Table S1.** Statistical analysis: ANOVA test and post hoc Duncan test.

| N. | Compound                       | ANOVA test      | Duncan test - groups |      |      |       |
|----|--------------------------------|-----------------|----------------------|------|------|-------|
|    |                                | <i>p-values</i> | LaCC                 | LaPE | LaPS | LaPRV |
| 1  | Tricyclene                     | <0.01           | c                    | b    | b    | a     |
| 2  | $\alpha$ -Thujene              | <0.01           | c                    | b    | c    | a     |
| 3  | $\alpha$ -Pinene               | <0.01           | d                    | a    | c    | b     |
| 4  | Camphene                       | <0.01           | d                    | b    | c    | a     |
| 5  | Sabinene                       | <0.01           | c                    | a    | c    | b     |
| 6  | $\beta$ -Pinene                | <0.01           | c                    | a    | c    | b     |
| 7  | 1-Octen-3-ol                   | <0.01           | c                    | b    | c    | a     |
| 8  | 3-Octanone                     | <0.01           | a                    | c    | bc   | b     |
| 9  | Myrcene                        | <0.01           | b                    | b    | a    | c     |
| 10 | Butyl butanoate                | <0.01           | a                    | b    | b    | b     |
| 11 | $\alpha$ -Phellandrene         | <0.01           | c                    | a    | b    | a     |
| 12 | 3-Carene                       | <0.01           | c                    | a    | b    | a     |
| 13 | $\alpha$ -Terpinene            | <0.01           | b                    | a    | b    | a     |
| 14 | 3-Undecen-1-yne                | <0.01           | a                    | b    | a    | b     |
| 15 | <i>p</i> -Cymene               | <0.01           | a                    | c    | d    | b     |
| 16 | Limonene                       | <0.01           | c                    | a    | b    | a     |
| 17 | 1,8-Cineole                    | <0.01           | d                    | a    | c    | b     |
| 18 | ( <i>Z</i> )- $\beta$ -Ocimene | <0.01           | a                    | a    | b    | a     |
| 19 | ( <i>E</i> )- $\beta$ -Ocimene | <0.01           | a                    | c    | d    | b     |
| 20 | $\gamma$ -Terpinene            | <0.01           | b                    | a    | b    | a     |
| 21 | <i>cis</i> -Sabinene hydrate   | <0.01           | b                    | a    | c    | b     |
| 22 | U                              | <0.01           | a                    | b    | c    | b     |
| 23 | Terpinolene                    | <0.01           | d                    | a    | c    | b     |
| 24 | Linalool                       | <0.01           | b                    | c    | d    | a     |
| 25 | Octen-3-yl acetate             | <0.01           | a                    | c    | b    | c     |
| 26 | allo-Ocimene                   | NS              | -                    | -    | -    | -     |
| 27 | <i>trans</i> -Pinocarveol      | <0.01           | a                    | b    | b    | b     |
| 28 | Camphor                        | <0.01           | d                    | b    | a    | c     |
| 29 | Borneol                        | <0.01           | d                    | b    | c    | a     |
| 30 | Lavandulol                     | <0.01           | a                    | b    | b    | c     |
| 31 | Terpinen-4-ol                  | <0.01           | c                    | b    | d    | a     |
| 32 | $\alpha$ -Terpineol            | <0.01           | c                    | b    | a    | c     |
| 33 | Hexyl butanoate                | <0.01           | c                    | a    | d    | b     |
| 34 | Estragole (Metil chavicol)     | NS              | -                    | -    | -    | -     |

|    |                                      |       |   |   |   |    |
|----|--------------------------------------|-------|---|---|---|----|
| 35 | Isobornyl formate                    | <0.01 | c | b | c | a  |
| 36 | Nerol                                | <0.01 | b | c | a | c  |
| 37 | Hexyl-2-metil butyrate               | <0.01 | d | a | c | b  |
| 38 | Cumin aldehyde                       | <0.01 | a | a | b | b  |
| 39 | Hexyl isovalerate                    | <0.01 | d | b | a | c  |
| 40 | Linalyl acetate                      | <0.01 | b | d | a | c  |
| 41 | Bornyl acetate                       | <0.01 | c | b | a | c  |
| 42 | Lavandulyl acetate                   | <0.01 | a | d | b | c  |
| 43 | Hexyl tiglate                        | <0.01 | d | a | c | b  |
| 44 | Eugenol                              | <0.01 | a | b | b | b  |
| 45 | Neryl acetate                        | <0.01 | b | c | a | c  |
| 46 | Copaene                              | <0.01 | a | b | b | b  |
| 47 | Daucene                              | <0.01 | c | b | a | c  |
| 48 | $\beta$ -Bourbonene                  | <0.01 | a | b | b | b  |
| 49 | <i>trans</i> -Myrtanol acetate       | <0.01 | b | c | a | c  |
| 50 | Hexyl hexanoate                      | <0.01 | b | a | c | b  |
| 51 | 7-epi-Sesquithujene                  | <0.01 | c | a | c | b  |
| 52 | Sesquithujene                        | <0.01 | c | a | b | a  |
| 53 | Longifolene                          | <0.01 | b | a | b | b  |
| 54 | ( <i>E</i> )-Caryophyllene           | <0.01 | a | c | b | d  |
| 55 | Linalyl butanoate                    | <0.01 | c | b | a | b  |
| 56 | $\beta$ -Copaene                     | <0.01 | a | b | b | b  |
| 57 | <i>trans</i> - $\alpha$ -Bergamotene | <0.01 | a | b | b | c  |
| 58 | Aromadendrene                        | <0.01 | a | b | c | c  |
| 59 | epi- $\beta$ -Santalene              | <0.01 | a | b | b | b  |
| 60 | $\alpha$ -Humulene                   | <0.01 | a | c | b | d  |
| 61 | ( <i>E</i> )- $\beta$ -Farnesene     | <0.01 | c | a | c | b  |
| 62 | 9-epi-( <i>E</i> )-Caryophyllene     | <0.01 | b | b | a | b  |
| 63 | Linalyl isovalerate                  | <0.01 | b | a | a | a  |
| 64 | Dauca-5,8-diene                      | <0.01 | c | b | a | c  |
| 65 | $\gamma$ -Muurolene                  | <0.01 | a | c | b | c  |
| 66 | $\alpha$ -Amorphene                  | <0.01 | a | b | b | b  |
| 67 | <i>trans</i> -Muurolo-4(14),5-       | <0.01 | a | b | c | c  |
| 68 | ( <i>E</i> )-Methyl Isoeugenol       | <0.05 | b | a | b | b  |
| 69 | ( <i>Z</i> )- $\alpha$ -Bisabolene   | <0.05 | b | a | b | ab |
| 70 | Lavandulyl isovalerate               | <0.01 | d | a | c | b  |
| 71 | $\gamma$ -Cadinene                   | <0.01 | c | b | a | c  |
| 72 | 6-methyl- $\alpha$ -Ionone           | <0.01 | a | c | b | c  |
| 73 | $\delta$ -Cadinene                   | <0.01 | b | b | a | c  |
| 74 | Spathulenol                          | <0.01 | b | b | a | b  |
| 75 | Caryophyllene oxide                  | <0.01 | a | c | b | c  |
| 76 | Guaiol                               | <0.01 | b | b | a | b  |
| 77 | 1,10-di-epi-Cubenol                  | <0.01 | b | b | a | b  |
| 78 | $\alpha$ -Muurolol                   | <0.01 | b | b | a | b  |
| 79 | Bisabolol oxide B                    | <0.01 | d | b | a | c  |
| 80 | Helifolenol A                        | <0.01 | a | c | b | c  |
| 81 | $\alpha$ -Bisabolol                  | <0.01 | d | b | a | c  |

For each compound, different letters for the Duncan test represent groups that are significantly different from each other using ANOVA at least  $p < 0.05$  (column 3); NS: not significant.
